# Supplementary material for: In situ monitoring of plasmon-driven photocatalytic reactions at gas–liquid–solid three-phase interfaces by surface-enhanced Raman spectroscopy
Source: Royal Society of Chemistry journal article supplement (doi:10.1039/c9tc02924a), 2019-01-01
Supplement: c9tc02924a1.pdf [file c9tc02924a1.pdf]

# In situ monitor of plasmon-driven photocatalytic reaction at gas-liquid-solid three phase interfaces by surface enhanced Raman spectroscopy

*Yukun Gao, Nan Yang, Sichen Lu, Tingting You<sup>\*</sup>, Penggang Yin<sup>\*</sup>*

Key Laboratory of Bio-inspired Smart Interfacial Science and Technology of Ministry

of Education, School of Chemistry, Beihang University, Beijing, China. E-mail:

[pgyin@buaa.edu.cn](mailto:pgyin@buaa.edu.cn). [se7enteenyuti@163.com](mailto:se7enteenyuti@163.com).

Key words: Plasmon-driven photocatalytic reaction, gas-liquid-solid interfaces,  
surface enhanced Raman spectroscopy, in situ detection.

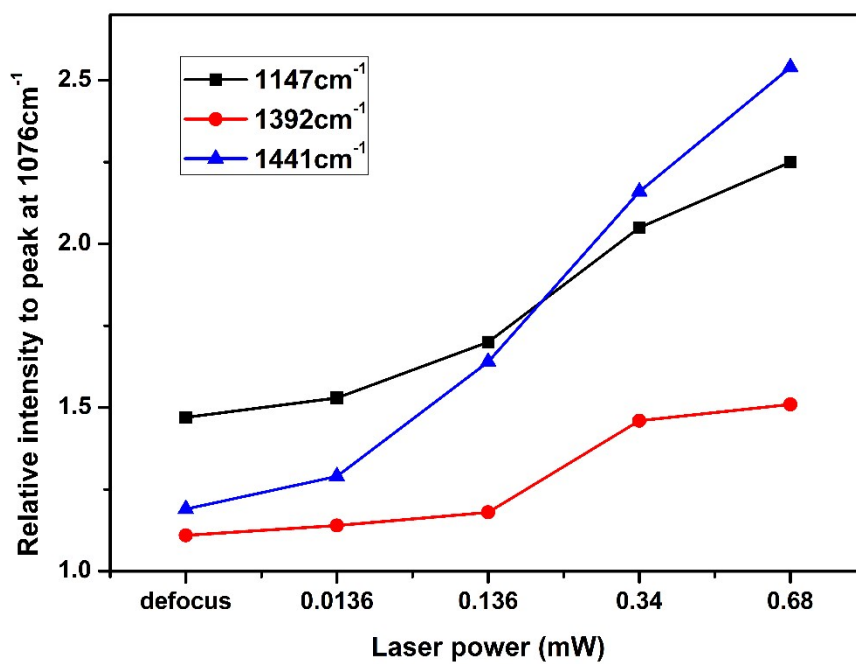

**Figure S1.** Plot line graph of laser dependent SERS relative intensities changing of peaks at 1147 cm<sup>-1</sup>, 1392 cm<sup>-1</sup> and 1441 cm<sup>-1</sup>.

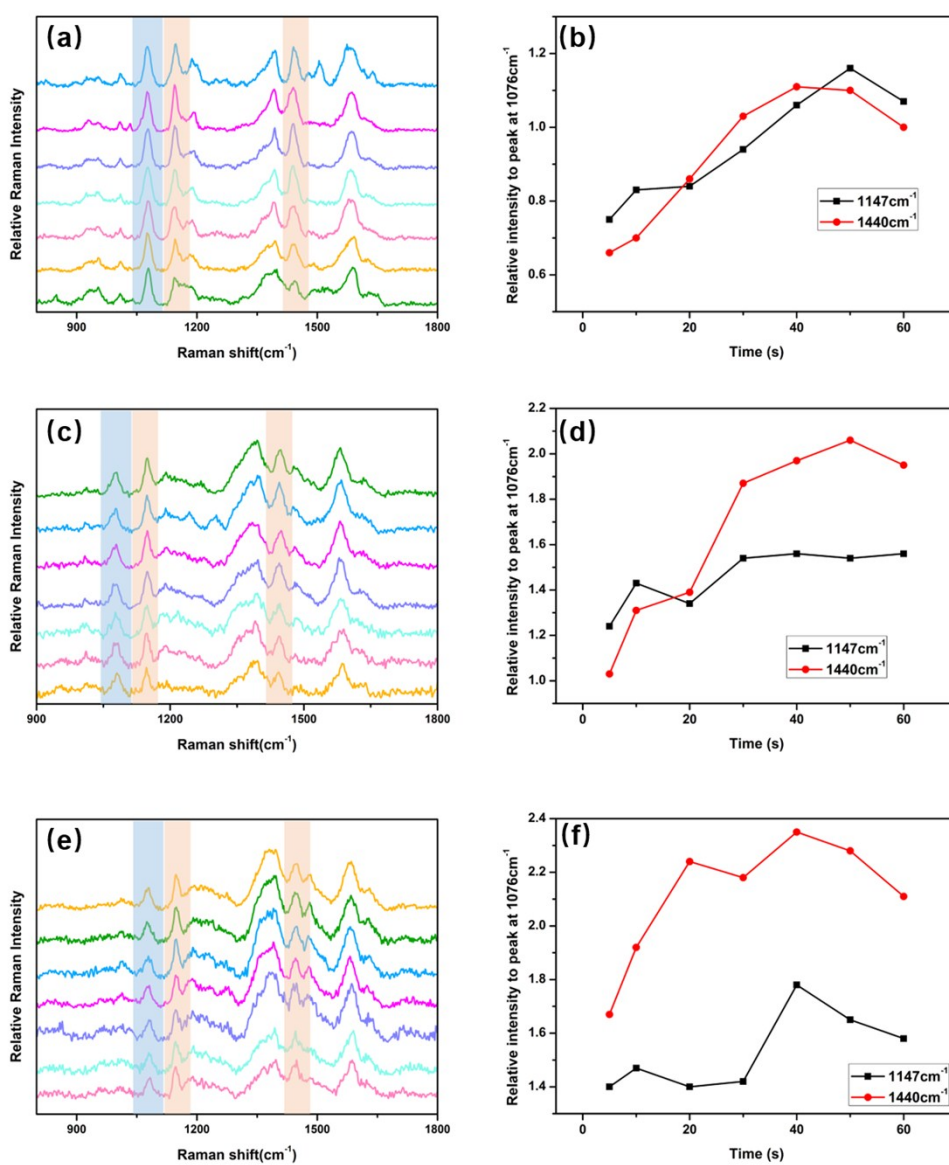

**Figure S2.** Time-dependent SERS spectra of Ag microwool/nanodendrites structure substrates with superhydrophobic (a), hydrophobic (c) and hydrophilic surface wettability; (b)(d)(f) Line chart of relative intensity of peak at 1147 cm<sup>-1</sup> and 1440 cm<sup>-1</sup> to peak at 1076 cm<sup>-1</sup> of the three substrates.

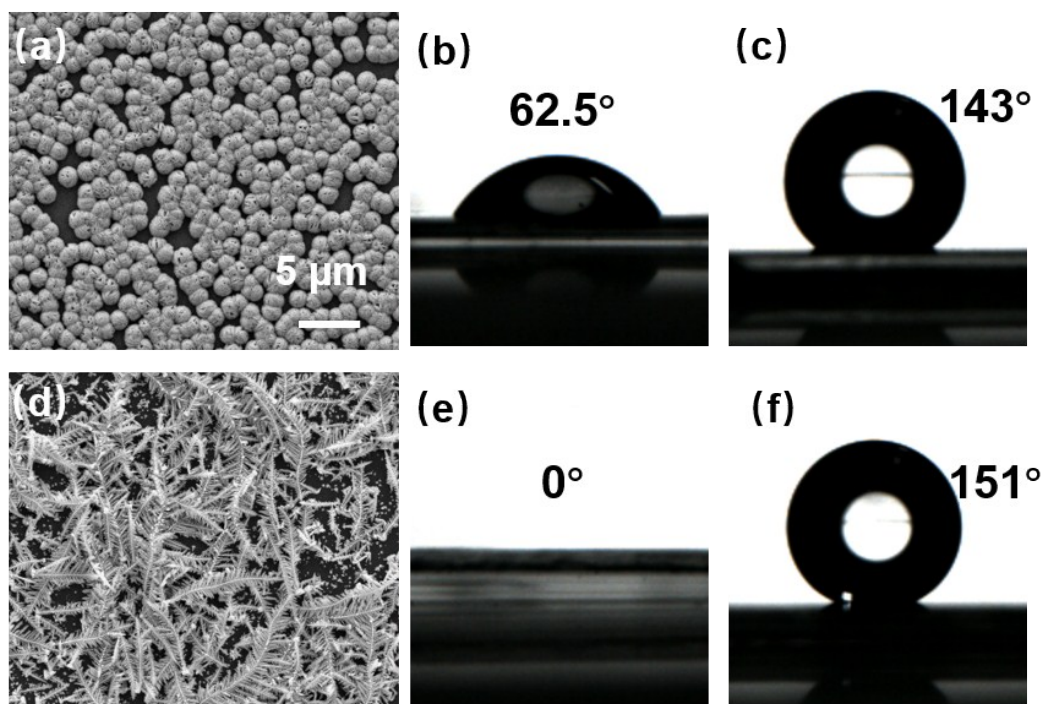

**Figure S3.** (a) (d) SEM pictures of the Ag micro-woo ball structure substrates and Ag nanodendrite structures with scale bar of 5 μm; (b)(c) Contact angle photo of Ag micro-woo ball structure substrates before and after low surface energy modification; (e)(f) Contact angle photo of Ag nanodendrite structures before and after low surface energy modification.

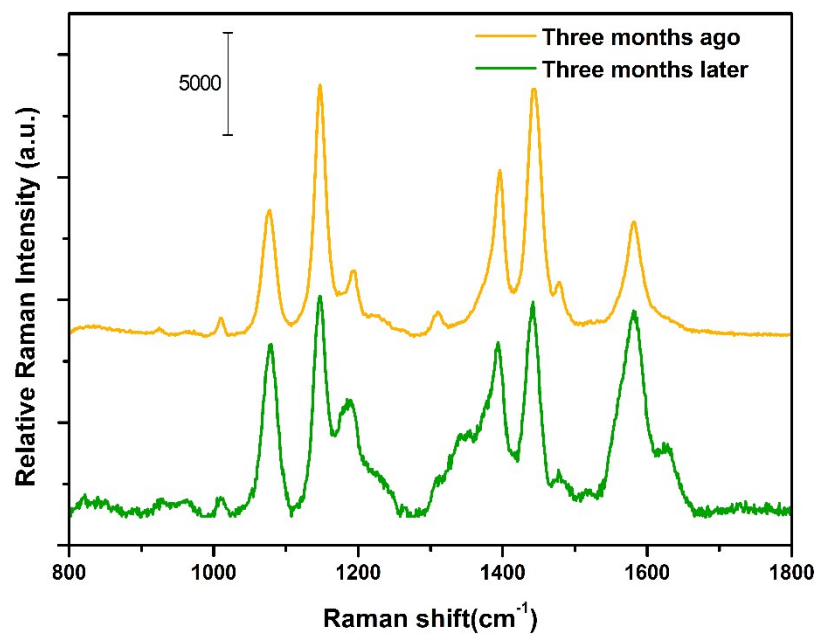

**Figure S4.** SERS spectra of the same superhydrophobic substrate detecting  $10^{-5}\text{M}$  PATP with the same conditions before and after three months. (laser power about 0.34 mW, exposure time is 3s)
